# Supplementary material for: Multivariate curve resolution of time course microarray data
Source: PubMed Central journal article supplement (PMC1539028; doi:10.1186/1471-2105-7-343), 2006-07-13
Supplement: 1471-2105-7-343-S1.pdf [file 1471-2105-7-343-S1.pdf]

**Table A.** Results of 7-component curve resolution analysis of Alpha-696 data showing significantly correlated genes from Spellman's classifications.

|                                         | Curve 1                                                                                                                                                               | Curve 2 | Curve 3                                    | Curve 4                                                                                                                                                                                                                                                                                                                                                                                                  | Curve 5                                                                                                                                                                                                                                                                                                                                                                                                                                             | Curve 6                                                                                       | Curve 7                                                                               |
|-----------------------------------------|-----------------------------------------------------------------------------------------------------------------------------------------------------------------------|---------|--------------------------------------------|----------------------------------------------------------------------------------------------------------------------------------------------------------------------------------------------------------------------------------------------------------------------------------------------------------------------------------------------------------------------------------------------------------|-----------------------------------------------------------------------------------------------------------------------------------------------------------------------------------------------------------------------------------------------------------------------------------------------------------------------------------------------------------------------------------------------------------------------------------------------------|-----------------------------------------------------------------------------------------------|---------------------------------------------------------------------------------------|
|                                         | AGA1 <b>M/G1</b> (3)<br>AGA2 <b>M/G1</b> (7)<br>KAR4 <b>M/G1</b> (9)<br>FUS1 <b>M/G1</b> (16)<br>SST2 <b>M/G1</b> (19)<br>AFR1 <b>M/G1</b> (22)<br>STE2 <b>M</b> (23) |         | CLB6 <b>G1</b> (3)<br>GLK1 <b>M/G1</b> (7) | HHF1 <b>S</b> (1)<br>HTB1 <b>S</b> (2)<br>HHF2 <b>S</b> (3)<br>HTA1 <b>S</b> (4)<br>HHO1 <b>S</b> (5)<br>HHT2 <b>S</b> (6)<br>HHT1 <b>S</b> (8)<br>HTA2 <b>S</b> (11)<br>HTB2 <b>S</b> (16)<br>HTA3 <b>S</b> (21)<br>SPC98 <b>G1</b> (22)<br>WSC2 <b>S</b> (23)<br>YNK1 <b>G1</b> (24)<br>SUR4 <b>G1</b> (25)<br>RFA3 <b>G1</b> (28)<br>PMT1 <b>G1</b> (37)<br>GDA1 <b>S</b> (41)<br>PDS1 <b>G1</b> (45) | CLB2 <b>M</b> (1)<br>CDC5 <b>M</b> (5)<br>IQG1 <b>M</b> (8)<br>CYK2 <b>M</b> (9)<br>CLB1 <b>M</b> (12)<br>ALK1 <b>M</b> (13)<br>MYO1 <b>M</b> (14)<br>SWI5 <b>M</b> (16)<br>BUD4 <b>M</b> (17)<br>CDC20 <b>M</b> (19)<br>PHO3 <b>M</b> (23)<br>PMP1 <b>M</b> (24)<br>MOB1 <b>M</b> (25)<br>CHS2 <b>M</b> (26)<br>PMA2 <b>M</b> (29)<br>ACE2 <b>M</b> (31)<br>PHO5 <b>M</b> (33)<br>PMA1 <b>M</b> (34)<br>KIP2 <b>G2</b> (36)<br>CDC47 <b>M</b> (39) | EGT2 <b>M/G1</b> (3)<br>ASH1 <b>M/G1</b> (6)<br>PCL9 <b>M/G1</b> (7)<br>SIC1 <b>M/G1</b> (11) | CTS1 <b>G1</b> (2)<br>BUD9 <b>G1</b> (7)<br>MSB2 <b>G1</b> (9)<br>PSA1 <b>G1</b> (10) |
| $N_{\text{tot}}$ ( $N_{\text{match}}$ ) | 23 (7)                                                                                                                                                                | 7 (0)   | 8 (2)                                      | 45 (18)                                                                                                                                                                                                                                                                                                                                                                                                  | 89 (29)                                                                                                                                                                                                                                                                                                                                                                                                                                             | 14 (4)                                                                                        | 12 (4)                                                                                |
| Classification:                         | M/G1                                                                                                                                                                  | None    | G1                                         | S                                                                                                                                                                                                                                                                                                                                                                                                        | M                                                                                                                                                                                                                                                                                                                                                                                                                                                   | M/G1                                                                                          | G1                                                                                    |
| Scores:                                 |                                                                                                                                                                       |         |                                            |                                                                                                                                                                                                                                                                                                                                                                                                          |                                                                                                                                                                                                                                                                                                                                                                                                                                                     |                                                                                               |                                                                                       |
| G1                                      | 0.000                                                                                                                                                                 | 0.000   | 0.007                                      | 0.041                                                                                                                                                                                                                                                                                                                                                                                                    | 0.000                                                                                                                                                                                                                                                                                                                                                                                                                                               | 0.000                                                                                         | 0.028                                                                                 |
| S                                       | 0.000                                                                                                                                                                 | 0.000   | 0.000                                      | 0.281                                                                                                                                                                                                                                                                                                                                                                                                    | 0.000                                                                                                                                                                                                                                                                                                                                                                                                                                               | 0.000                                                                                         | 0.000                                                                                 |
| G2                                      | 0.000                                                                                                                                                                 | 0.000   | 0.000                                      | 0.000                                                                                                                                                                                                                                                                                                                                                                                                    | 0.144                                                                                                                                                                                                                                                                                                                                                                                                                                               | 0.000                                                                                         | 0.000                                                                                 |
| M                                       | 0.013                                                                                                                                                                 | 0.000   | 0.000                                      | 0.000                                                                                                                                                                                                                                                                                                                                                                                                    | 0.331                                                                                                                                                                                                                                                                                                                                                                                                                                               | 0.000                                                                                         | 0.000                                                                                 |
| M/G1                                    | 0.130                                                                                                                                                                 | 0.000   | 0.020                                      | 0.000                                                                                                                                                                                                                                                                                                                                                                                                    | 0.000                                                                                                                                                                                                                                                                                                                                                                                                                                               | 0.087                                                                                         | 0.000                                                                                 |
