# Supplementary material for: Multivariate curve resolution of time course microarray data
Source: PubMed Central journal article supplement (PMC1539028; doi:10.1186/1471-2105-7-343), 2006-07-13
Supplement: 1471-2105-7-343-S2.pdf [file 1471-2105-7-343-S2.pdf]

**Table B.** Results of 5-component curve resolution analysis of Alpha-Full data showing significantly correlated genes from Spellman's classifications.

|                                         | Curve 1                                                                                                                                         | Curve 2                                                                                                                                                                                                                                                                                                                                                                                                                                                                                                                                                                                        | Curve 3                                                                                                                                                                                                                                                                                                                                                                                                                                                                                                                                                                              | Curve 4                                                                                                                                                                                                                                                                                                                                                                                                                                                                                                                                                                                             | Curve 5                                                                                                                                                                                                                                                                                                                                                                                                                                                                                                                                                                                                |
|-----------------------------------------|-------------------------------------------------------------------------------------------------------------------------------------------------|------------------------------------------------------------------------------------------------------------------------------------------------------------------------------------------------------------------------------------------------------------------------------------------------------------------------------------------------------------------------------------------------------------------------------------------------------------------------------------------------------------------------------------------------------------------------------------------------|--------------------------------------------------------------------------------------------------------------------------------------------------------------------------------------------------------------------------------------------------------------------------------------------------------------------------------------------------------------------------------------------------------------------------------------------------------------------------------------------------------------------------------------------------------------------------------------|-----------------------------------------------------------------------------------------------------------------------------------------------------------------------------------------------------------------------------------------------------------------------------------------------------------------------------------------------------------------------------------------------------------------------------------------------------------------------------------------------------------------------------------------------------------------------------------------------------|--------------------------------------------------------------------------------------------------------------------------------------------------------------------------------------------------------------------------------------------------------------------------------------------------------------------------------------------------------------------------------------------------------------------------------------------------------------------------------------------------------------------------------------------------------------------------------------------------------|
|                                         | AGA2 <b>M/G1</b> (4, 0.94)<br>AGA1 <b>M/G1</b> (5, 0.90)<br>MFA1 <b>G1</b> (9, 0.84)<br>STE2 <b>M</b> (11, 0.82)<br>SST2 <b>M/G1</b> (13, 0.81) | POL30 <b>G1</b> (1, 0.95)<br>CLN2 <b>G1</b> (2, 0.95)<br>MCD1 <b>G1</b> (3, 0.94)<br>RNR1 <b>G1</b> (4, 0.93)<br>SWI4 <b>M/G1</b> (6, 0.93)<br>CLB6 <b>G1</b> (7, 0.92)<br>RAD53 <b>G1</b> (8, 0.92)<br>RAD51 <b>G1</b> (9, 0.92)<br>SVS1 <b>G1</b> (10, 0.92)<br>CTF4 <b>G1</b> (11, 0.91)<br>MNN1 <b>G1</b> (15, 0.90)<br>RNR3 <b>G1</b> (17, 0.89)<br>SMC3 <b>G1</b> (21, 0.89)<br>CDC9 <b>G1</b> (22, 0.89)<br>CSI2 <b>G1</b> (23, 0.89)<br>MSH6 <b>G1</b> (24, 0.89)<br>RFA1 <b>G1</b> (25, 0.89)<br>CDC21 <b>G1</b> (29, 0.88)<br>MSH2 <b>G1</b> (30, 0.88)<br>CLB5 <b>G1</b> (32, 0.88) | HTA3 <b>S</b> (4, 0.94)<br>ERG3 <b>G2</b> (6, 0.92)<br>ALK1 <b>M</b> (7, 0.92)<br>AUR1 <b>G2</b> (19, 0.90)<br>CDC5 <b>M</b> (24, 0.90)<br>TUB2 <b>G2</b> (30, 0.89)<br>KIP2 <b>G2</b> (33, 0.89)<br>MOB1 <b>M</b> (36, 0.89)<br>ORC1 <b>G2</b> (37, 0.89)<br>CWP2 <b>G2</b> (43, 0.89)<br>HHO1 <b>S</b> (45, 0.88)<br>CLB2 <b>M</b> (48, 0.88)<br>GDA1 <b>S</b> (49, 0.88)<br>ACE2 <b>M</b> (57, 0.88)<br>BUD4 <b>M</b> (62, 0.88)<br>ALG7 <b>G2</b> (70, 0.88)<br>KIP3 <b>G2</b> (74, 0.88)<br>TEM1 <b>M</b> (77, 0.88)<br>SSO2 <b>G2</b> (79, 0.88)<br>MET17 <b>G2</b> (82, 0.88) | MET6 <b>S</b> (8, 0.88)<br>SSO2 <b>G2</b> (33, 0.87)<br>HST3 <b>M</b> (79, 0.86)<br>KIP2 <b>G2</b> (290, 0.85)<br>SHE2 <b>M</b> (307, 0.85)<br>BUD4 <b>M</b> (308, 0.84)<br>CHS6 <b>G2</b> (410, 0.84)<br>PMI40 <b>S</b> (454, 0.84)<br>PMP1 <b>M</b> (478, 0.84)<br>APC1 <b>M</b> (531, 0.83)<br>NUF2 <b>M</b> (559, 0.83)<br>WHI3 <b>G2</b> (632, 0.83)<br>ACE2 <b>M</b> (652, 0.83)<br>BUD3 <b>G2</b> (683, 0.83)<br>SUC2 <b>M</b> (699, 0.83)<br>ALK1 <b>M</b> (704, 0.83)<br>PMA1 <b>M</b> (743, 0.83)<br>SAS3 <b>G2</b> (790, 0.83)<br>SWI5 <b>M</b> (844, 0.82)<br>SUT1 <b>M</b> (855, 0.82) | ASH1 <b>M/G1</b> (8, 0.91)<br>SIC1 <b>M/G1</b> (9, 0.91)<br>PCL9 <b>M/G1</b> (10, 0.91)<br>FAA3 <b>M/G1</b> (12, 0.90)<br>FTR1 <b>M</b> (18, 0.88)<br>EGT2 <b>M/G1</b> (20, 0.88)<br>MCM2 <b>M</b> (21, 0.87)<br>CDC47 <b>M</b> (22, 0.87)<br>PHO11 <b>M</b> (24, 0.86)<br>FET3 <b>M</b> (25, 0.86)<br>PHO5 <b>M</b> (28, 0.86)<br>PMA1 <b>M</b> (29, 0.86)<br>VAP1 <b>M</b> (38, 0.85)<br>FAA4 <b>M/G1</b> (40, 0.85)<br>BUD9 <b>G1</b> (43, 0.85)<br>MCM3 <b>M/G1</b> (44, 0.85)<br>PHO12 <b>M</b> (45, 0.85)<br>CDC6 <b>M/G1</b> (47, 0.85)<br>PHO3 <b>M</b> (62, 0.83)<br>IQG1 <b>M</b> (63, 0.83) |
| $N_{\text{tot}}$ ( $N_{\text{match}}$ ) | 13 (5)                                                                                                                                          | 155 (53)                                                                                                                                                                                                                                                                                                                                                                                                                                                                                                                                                                                       | 2445 (107)                                                                                                                                                                                                                                                                                                                                                                                                                                                                                                                                                                           | 2046 (46)                                                                                                                                                                                                                                                                                                                                                                                                                                                                                                                                                                                           | 271 (31)                                                                                                                                                                                                                                                                                                                                                                                                                                                                                                                                                                                               |
| Classification:                         | M/G1                                                                                                                                            | G1                                                                                                                                                                                                                                                                                                                                                                                                                                                                                                                                                                                             | S, G2, M                                                                                                                                                                                                                                                                                                                                                                                                                                                                                                                                                                             | G2, M                                                                                                                                                                                                                                                                                                                                                                                                                                                                                                                                                                                               | M, M/G1                                                                                                                                                                                                                                                                                                                                                                                                                                                                                                                                                                                                |
| Scores:                                 |                                                                                                                                                 |                                                                                                                                                                                                                                                                                                                                                                                                                                                                                                                                                                                                |                                                                                                                                                                                                                                                                                                                                                                                                                                                                                                                                                                                      |                                                                                                                                                                                                                                                                                                                                                                                                                                                                                                                                                                                                     |                                                                                                                                                                                                                                                                                                                                                                                                                                                                                                                                                                                                        |
| G1                                      | 0.007                                                                                                                                           | 0.356                                                                                                                                                                                                                                                                                                                                                                                                                                                                                                                                                                                          | 0.154                                                                                                                                                                                                                                                                                                                                                                                                                                                                                                                                                                                | 0.027                                                                                                                                                                                                                                                                                                                                                                                                                                                                                                                                                                                               | 0.021                                                                                                                                                                                                                                                                                                                                                                                                                                                                                                                                                                                                  |
| S                                       | 0.000                                                                                                                                           | 0.000                                                                                                                                                                                                                                                                                                                                                                                                                                                                                                                                                                                          | 0.716                                                                                                                                                                                                                                                                                                                                                                                                                                                                                                                                                                                | 0.178                                                                                                                                                                                                                                                                                                                                                                                                                                                                                                                                                                                               | 0.000                                                                                                                                                                                                                                                                                                                                                                                                                                                                                                                                                                                                  |
| G2                                      | 0.000                                                                                                                                           | 0.000                                                                                                                                                                                                                                                                                                                                                                                                                                                                                                                                                                                          | 0.637                                                                                                                                                                                                                                                                                                                                                                                                                                                                                                                                                                                | 0.315                                                                                                                                                                                                                                                                                                                                                                                                                                                                                                                                                                                               | 0.000                                                                                                                                                                                                                                                                                                                                                                                                                                                                                                                                                                                                  |
| M                                       | 0.013                                                                                                                                           | 0.000                                                                                                                                                                                                                                                                                                                                                                                                                                                                                                                                                                                          | 0.389                                                                                                                                                                                                                                                                                                                                                                                                                                                                                                                                                                                | 0.270                                                                                                                                                                                                                                                                                                                                                                                                                                                                                                                                                                                               | 0.208                                                                                                                                                                                                                                                                                                                                                                                                                                                                                                                                                                                                  |
| M/G1                                    | 0.064                                                                                                                                           | 0.083                                                                                                                                                                                                                                                                                                                                                                                                                                                                                                                                                                                          | 0.020                                                                                                                                                                                                                                                                                                                                                                                                                                                                                                                                                                                | 0.020                                                                                                                                                                                                                                                                                                                                                                                                                                                                                                                                                                                               | 0.272                                                                                                                                                                                                                                                                                                                                                                                                                                                                                                                                                                                                  |
